# Supplementary material for: Nostoc edaphicum CCNP1411 from the Baltic Sea—A New Producer of Nostocyclopeptides
Source: PubMed Central journal article supplement (PMC7551626; doi:10.3390/md18090442), 2020-08-26
Supplement: marinedrugs-18-00442-s001.pdf [file marinedrugs-18-00442-s001.pdf]

# Supplementary Material: *Nostoc edaphicum* CCNP1411 from the Baltic Sea – a new producer of nostocyclopeptides

Anna Fidor <sup>1</sup>, Michał Grabski <sup>2</sup>, Jan Gawor <sup>3</sup>, Robert Gromadka <sup>3</sup>, Grzegorz Węgrzyn <sup>2</sup>, Hanna Mazur-Marzec <sup>1\*</sup>

<sup>1</sup> Division of Marine Biotechnology, Faculty of Oceanography and Geography, University of Gdansk, Marszałka J. Piłsudskiego 46, PL-81378 Gdynia, Poland; [anna.fidor@phdstud.ug.edu.pl](mailto:anna.fidor@phdstud.ug.edu.pl) (A.F.);

<sup>2</sup> Department of Molecular Biology, University of Gdansk, Wita Stwosza 59, 80-308 Gdansk, Poland; [grzegorz.wegrzyn@biol.ug.edu.pl](mailto:grzegorz.wegrzyn@biol.ug.edu.pl) (G.W.); [michal.grabski@phdstud.ug.edu.pl](mailto:michal.grabski@phdstud.ug.edu.pl) (M.G.);

<sup>3</sup> Institute of Biochemistry and Biophysics, Polish Academy of Sciences, DNA Sequencing and Oligonucleotide Synthesis Laboratory, Warsaw, Poland; [gaworj@ibb.waw.pl](mailto:gaworj@ibb.waw.pl) (J.G.); [robert@ibb.waw.pl](mailto:robert@ibb.waw.pl) (R.G.)

\* Correspondence: [hanna.mazur-marzec@ug.edu.pl](mailto:hanna.mazur-marzec@ug.edu.pl); Tel.: +48 -58-523-66-21; +609-419-132 (H.M.M.)

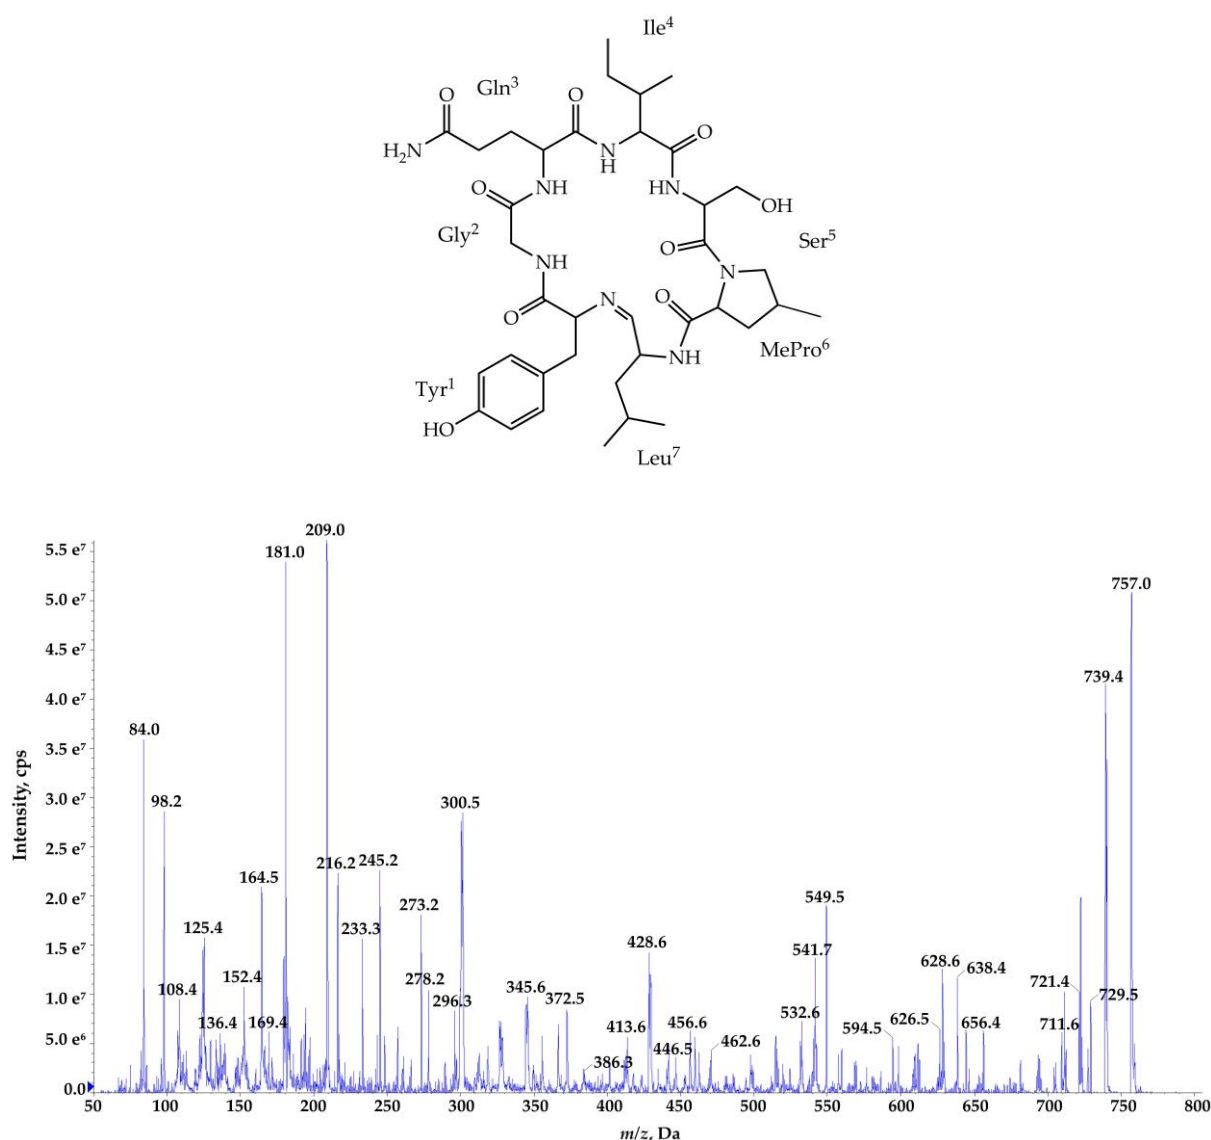

**Figure S1:** Structure and enhanced product ion mass spectrum of the cyclic nostocyclopeptide **Ncp-A1** cyclo[Tyr+Gly+Gln+Ile+Ser+MePro+Leu] identified based on the following fragment ions:  $m/z$  757 [M+H]; 739 [M+H – H<sub>2</sub>O]; 729 [M+H – CO]; 721 [M+H – 2H<sub>2</sub>O]; 628 [M+H – MePro – H<sub>2</sub>O], 626 [M+H – Ile – H<sub>2</sub>O]; 594 [M+H – Tyr]; 549 [Tyr+Gly+Gln+Ile+Ser+H]; 541 [M+H – (Ser+MePro) – H<sub>2</sub>O], 446 [M+H – (Ile+Ser+MePro)]; 428 [M+H – (Ile+Ser+MePro) – H<sub>2</sub>O]; 386 [Gly+Gln+Ile+Ser+H]; 372 [MePro+Leu+Tyr+H]; 300 [Leu+Tyr+Gly+H – H<sub>2</sub>O]; 209 [MePro+Leu+H]; 181 [MePro+Leu+H – CO]; 86 – Ile/Leu immonium; 84 MePro immonium.

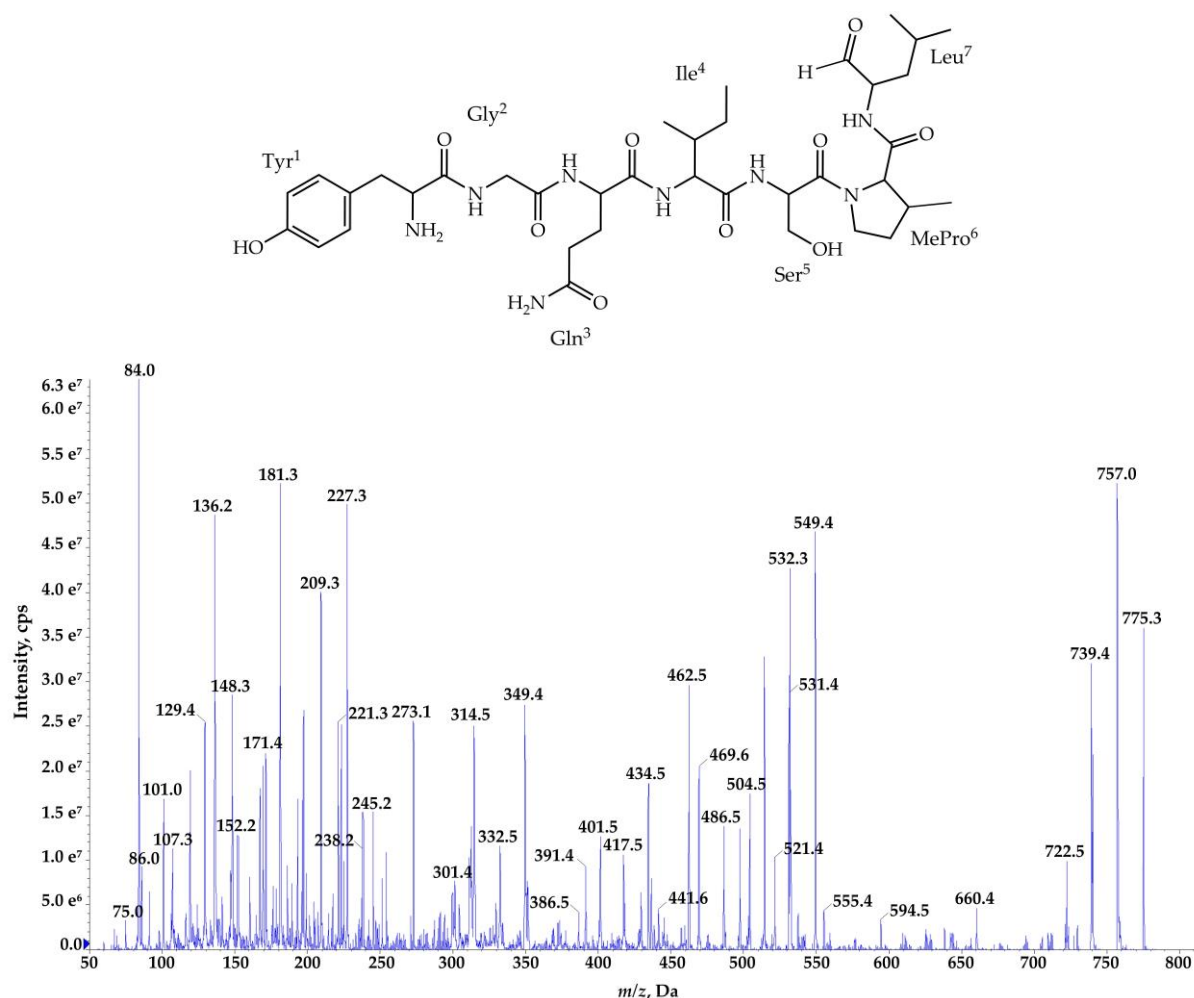

**Figure S2:** Structure and enhanced product ion mass spectrum of the linear peptide aldehyde **Ncp-A1-L** (linear aldehyde of **Ncp-A1**) Tyr+Gly+Gln+Ile+Ser+MePro+Leu identified based on the following fragment ions:  $m/z$  775 [M+H]; 757 [M+H – H<sub>2</sub>O]; 739 [M+H – 2H<sub>2</sub>O]; 660 [M+H – Leu]; 549 [Tyr+Gly+Gln+Ile+Ser+H]; 531 [Tyr+Gly+Gln+Ile+Ser+H – H<sub>2</sub>O]; 521 [Tyr+Gly+Gln+Ile+Ser+H – CO]; 532 [M+H – (MePro+Leu) – H<sub>2</sub>O]; 462 [Tyr+Gly+Gln+Ile+H]; 434 [Tyr+Gly+Gln+Ile+H – CO]; 386 [Gly+Gln+Ile+Ser+H]; 349 [Tyr+Gly+Gln+H]; 301 [Gln+Ile+Ser+H – CO]; 227 [MePro+Leu+H]; 221 [Tyr+Gly+H]; 209 [MePro+Leu+H – H<sub>2</sub>O]; 181 [MePro+Ile+H – H<sub>2</sub>O – CO]; 148 [Tyr – NH<sub>2</sub>]; 136 Tyr immonium; 86 – Ile/Leu immonium; 84, 101 (immonium), 129 Gln; 84 MePro immonium.

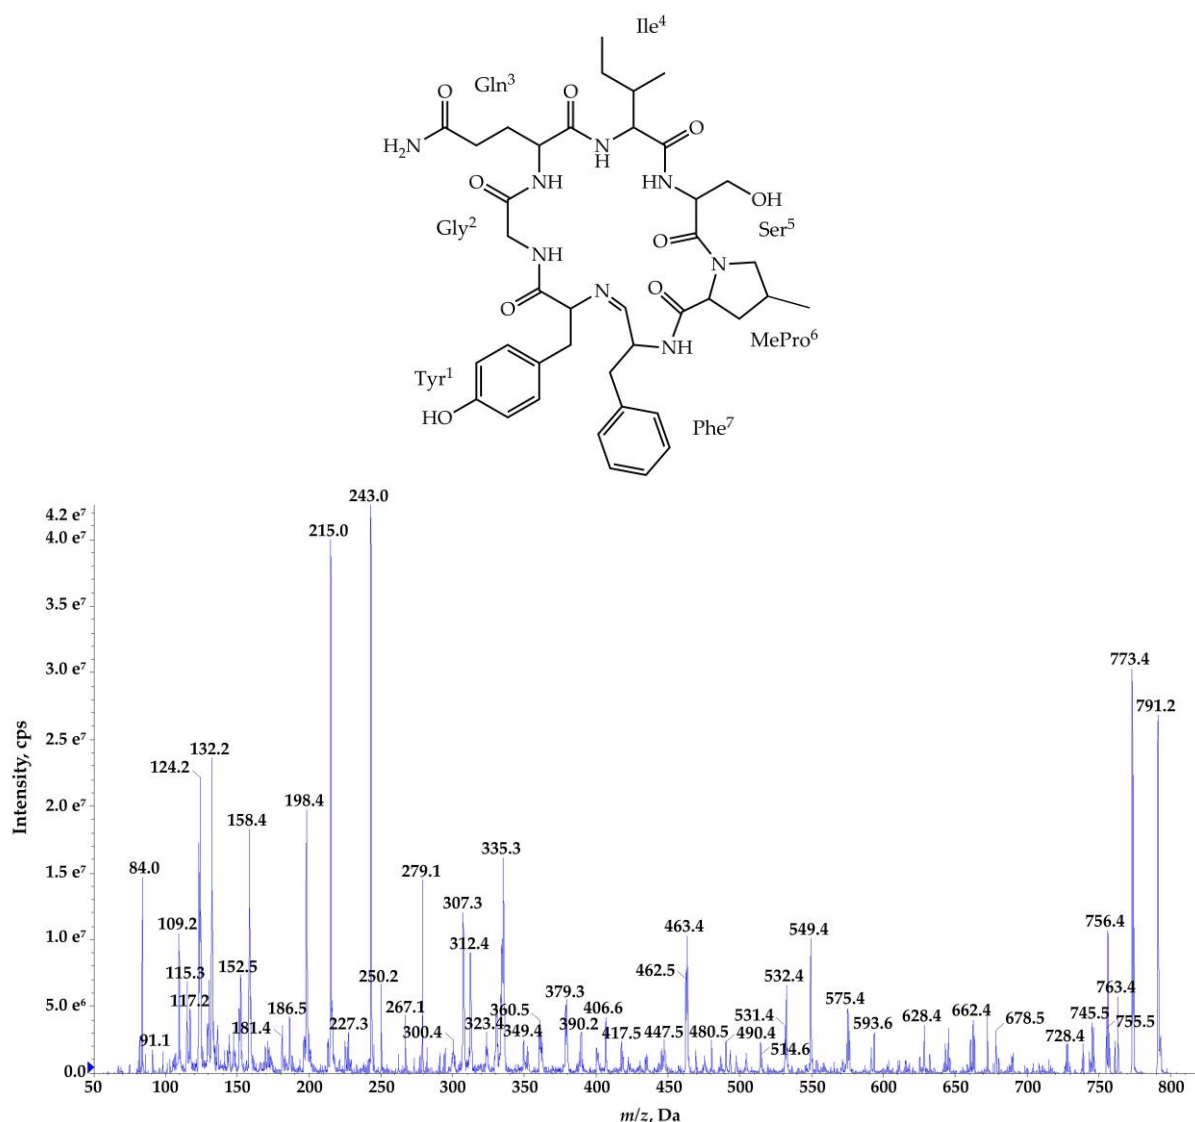

**Figure S3:** Structure and enhanced product ion mass spectrum of the cyclic nostocyclopeptide **Ncp-A2** cyclo[Tyr+Gly+Gln+Ile+Ser+MePro+Phe] identified based on the following fragment ions:  $m/z$  791 [M+H]; 773 [M+H – H<sub>2</sub>O]; 763 [M+H – CO]; 755 [M+H – 2H<sub>2</sub>O]; 745 [M+H – CO – H<sub>2</sub>O]; 678 [M+H – Ile]; 628 [M+H – Tyr]; 593 [M+H – (Ser+MePro)]; 549 [Tyr+Gly+Gln+Ile+Ser+H]; 531 [Tyr+Gly+Gln+Ile+Ser+H – H<sub>2</sub>O]; 480 [M+H – (Ile+Ser+MePro)]; 462 [Tyr+Gly+Gln+Ile+H]; 406 [MePro+Phe+Tyr+H]; 379 [MePro+Phe+Tyr+H – CO]; 349 [Tyr+Gly+Gln+H]; 335 [Phe+Tyr+Gly+H – H<sub>2</sub>O]; 312 [Ile+Ser+MePro+H]; 307 [Phe+Tyr+Gly+H – H<sub>2</sub>O – CO]; 243 [MePro+Phe+H]; 215 [MePro+Phe+H – CO]; 158 [Gly+Gln+H – CO]; 132 Phe; 84 MePro immonium.

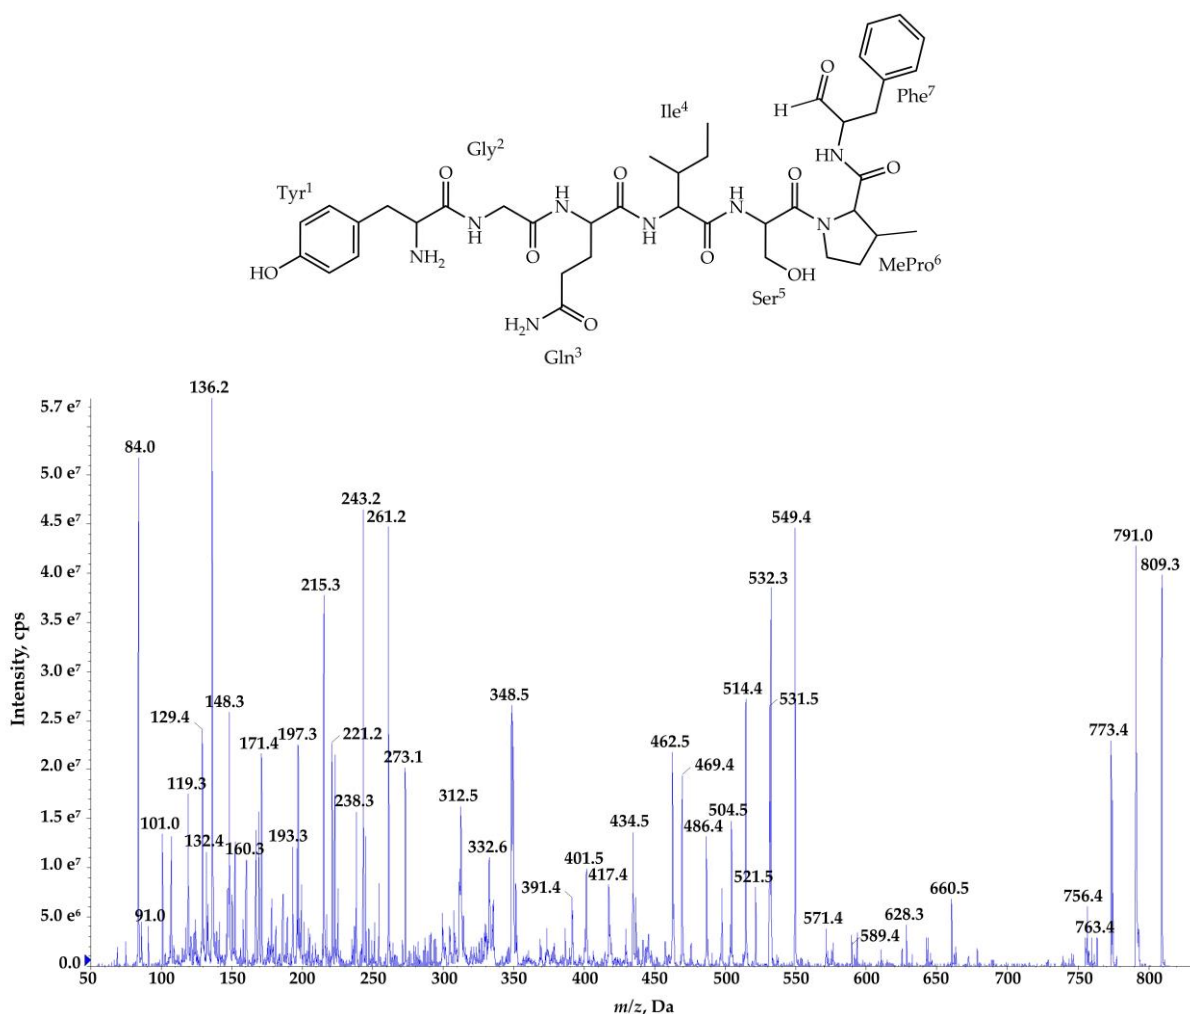

**Figure S4:** Structure and enhanced product ion mass spectrum of the linear nostocyclopeptide aldehyde **Ncp-A2-L** (linear aldehyde of **Ncp-A2**) Tyr+Gly+Gln+Ile+Ser+MePro+Phe identified based on the following fragment ions:  $m/z$  809 [M+H]; 791 [M+H – H<sub>2</sub>O]; 773 [M+H – 2H<sub>2</sub>O]; 763 [M+H – CO – H<sub>2</sub>O]; 660 [M+H – Phe]; 628 [M+H – Tyr – H<sub>2</sub>O]; 549 [Tyr+Gly+Gln+Ile+Ser+H]; 531 [M+H – (MePro+Phe) – H<sub>2</sub>O]; 462 [Tyr+Gly+Gln+Ile+H]; 434 [Tyr+Gly+Gln+Ile+H – CO]; 312 [Ile+Ser+MePro+H]; 261 [MePro+Phe+H]; 243 [MePro+Phe+H – H<sub>2</sub>O]; 221 [Tyr+Gly+H], 193 [Tyr+Gly+H – CO]; 148 [Tyr – NH<sub>2</sub>]; 136 Tyr immonium; 84, 101 (immonium), 129 Gln; 84 MePro immonium.

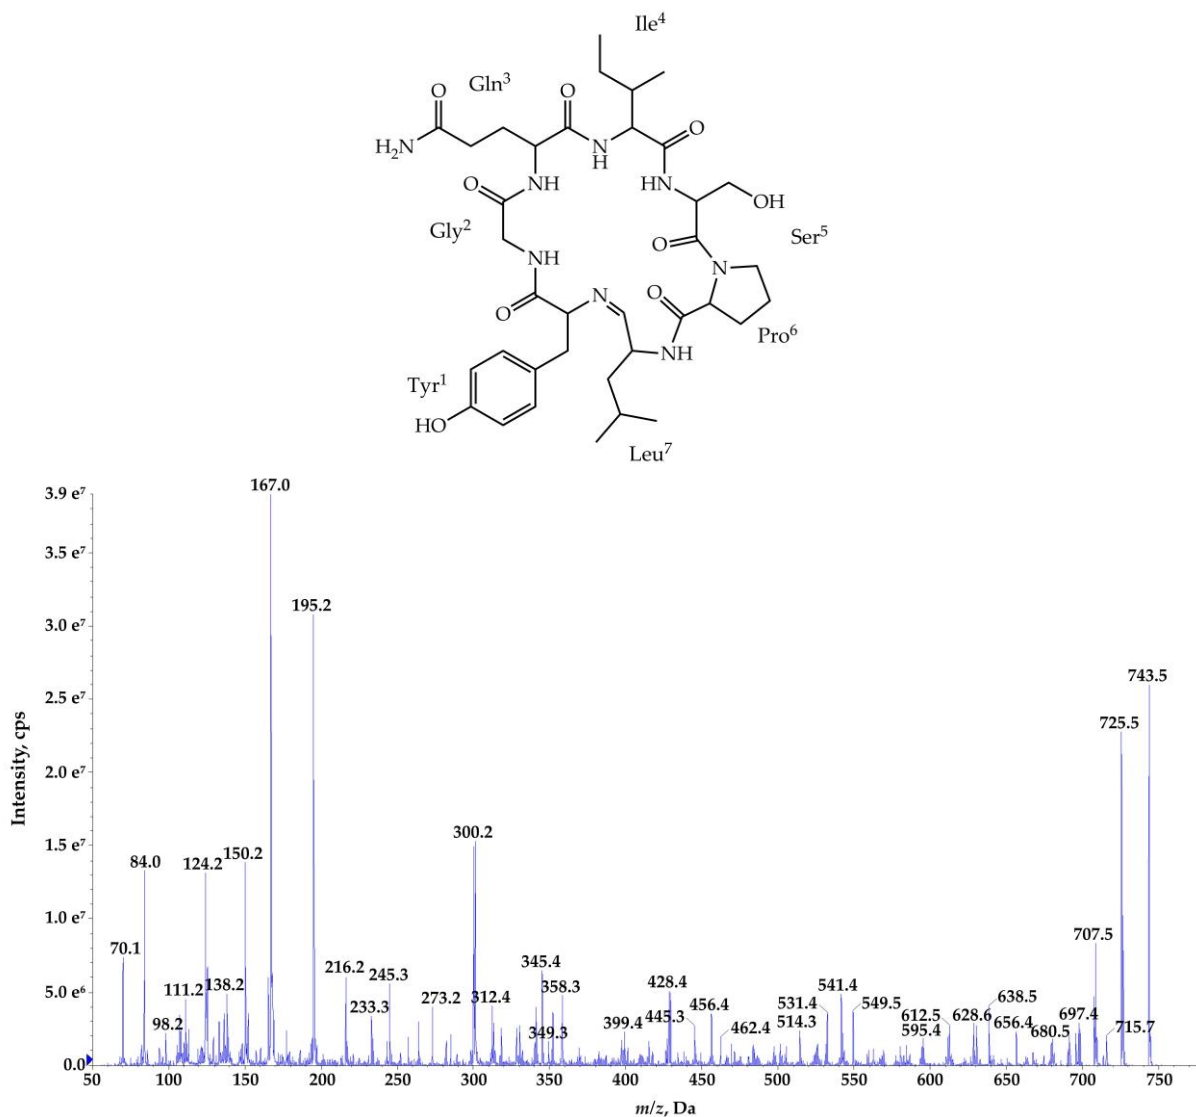

**Figure S5:** Proposed structure and enhanced product ion mass spectrum of cyclic nostocyclopeptide **Ncp-E2** cyclo[Tyr+Gly+Gln+Ile+Ser+Pro+Leu] characterized based on the following fragment ions:  $m/z$  743 [M+H]; 725 [M+H - H<sub>2</sub>O]; 715 [M+H - CO]; 707 [M+H - 2H<sub>2</sub>O]; 697 [M+H - H<sub>2</sub>O - CO]; 656 [M+H - Ser]; 638 [M+H - Ser - H<sub>2</sub>O]; 628 [M+H - Ser - CO]; 612 [M+H - Ile - H<sub>2</sub>O]; 549 [Tyr+Gly+Gln+Ile+Ser+H]; 541 [M+H - (Ser+Pro) - H<sub>2</sub>O]; 531 [Tyr+Gly+Gln+Ile+Ser+H - H<sub>2</sub>O]; 428 [M+H - (Ile+Ser+Pro) - H<sub>2</sub>O]; 349 [Tyr+Gly+Gln+H]; 300 [Leu+Tyr+Gly+H - H<sub>2</sub>O]; 195 [Pro+Leu+H]; 167 [Pro+Leu+H - CO]; 84 Gln; 70 Pro immonium.

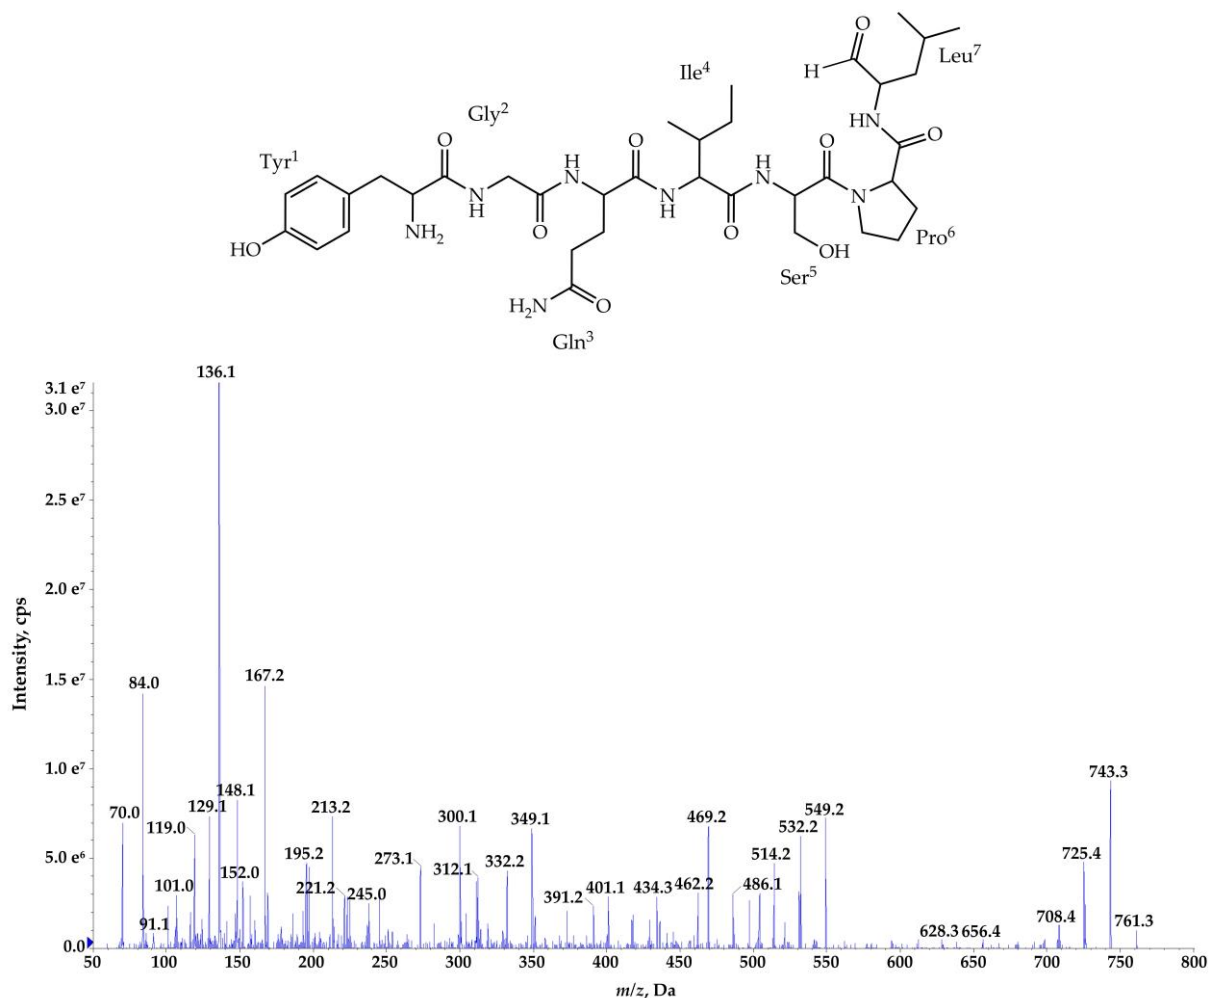

**Figure S6:** Proposed structure and enhanced product ion mass spectrum of the linear nostocyclopeptide aldehyde **Ncp-E2-L** (linear aldehyde of **Ncp-E2**) with general structure Tyr+Gly+Gln+Ile+Ser+Pro+Leu characterized based on the following fragment ions: *m/z* 761 [M+H]; 743 [M+H - H<sub>2</sub>O]; 725 [M+H - 2H<sub>2</sub>O]; 549 [Tyr+Gly+Gln+Ile+Ser+H]; 532 [Tyr+Gly+Gln+Ile+Ser+H - H<sub>2</sub>O]; 462 [Tyr+Gly+Gln+Ile+H]; 349 [Tyr+Gly+Gln+H]; 434 [Tyr+Gly+Gln+Ile+H - CO]; 300 [Ser+Pro+Leu+H]; 221 [Tyr+Gly+H]; 213 [Pro+Leu+H]; 195 [Pro+Leu+H - H<sub>2</sub>O]; 148 [Tyr - NH<sub>2</sub>]; 136 Tyr immonium; 84, 101 (immonium), 129 Gln; 70 Pro immonium.

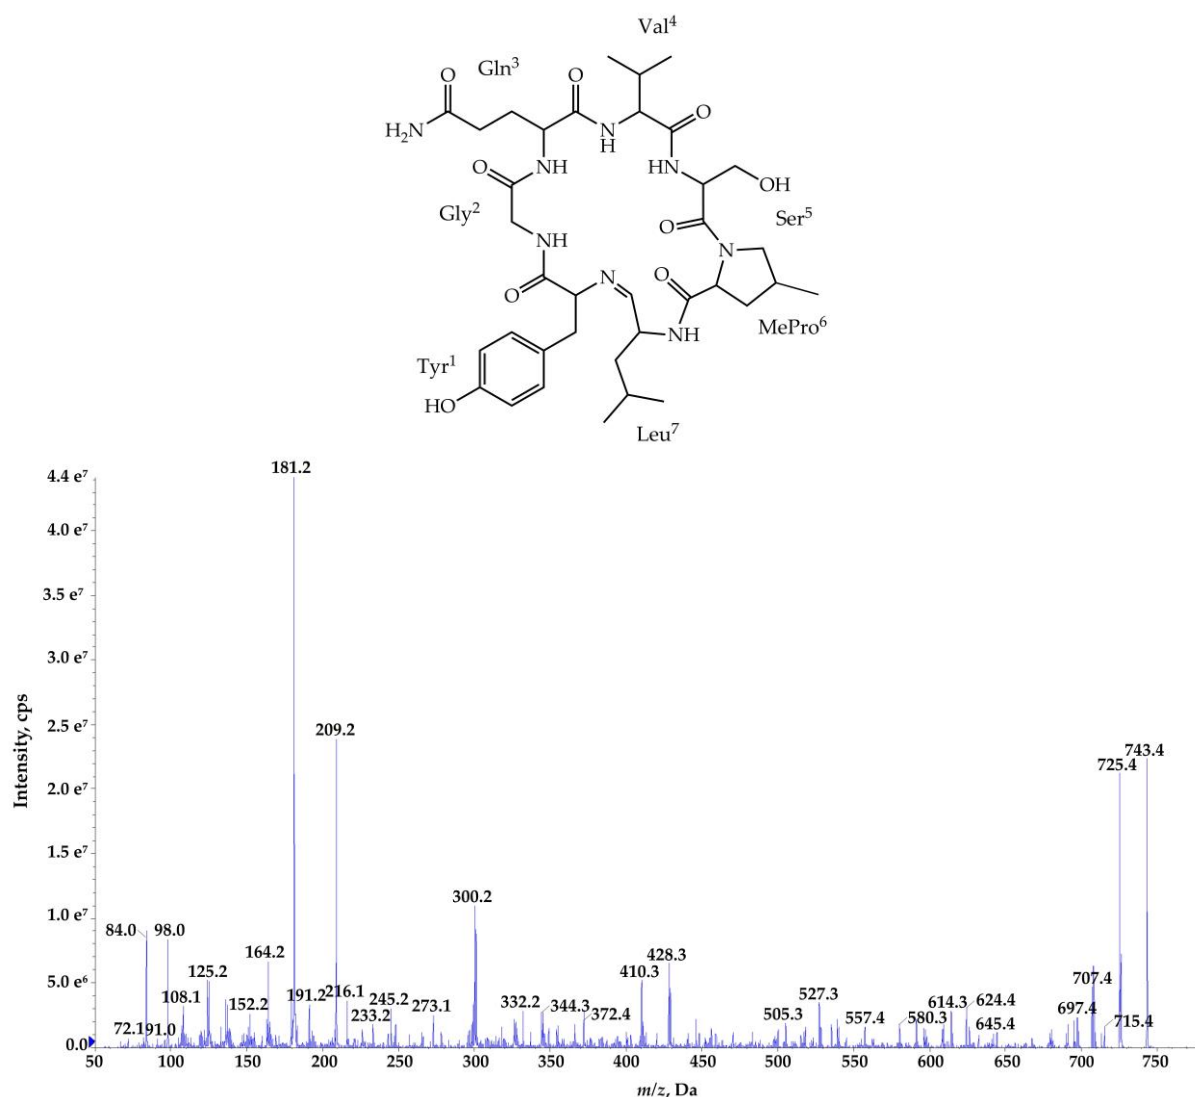

**Figure S7:** Proposed structure and enhanced product ion mass spectrum of cyclic nostocyclopeptide **Ncp-E3** cyclo[Tyr+Gly+Gln+Val+Ser+MePro+Leu] characterized based on the following fragment ions:  $m/z$  743 [M+H]; 725 [M+H – H<sub>2</sub>O]; 715 [M+H – CO]; 707 [M+H – 2H<sub>2</sub>O]; 697 [M+H – H<sub>2</sub>O – CO]; 645 [M+H – Val]; 580 [M+H – Tyr]; 527 [M+H – (Ser+MePro) – H<sub>2</sub>O]; 428 [M+H – (Val+Ser+MePro) – H<sub>2</sub>O]; 410 [M+H – (Val+Ser+MePro) – 2H<sub>2</sub>O]; 372 [Gly+Gln+Val+Ser+H] ; 344 [Gly+Gln+Val+Ser+H – CO]; 300 [Leu+Tyr+Gly+H – H<sub>2</sub>O]; 233 [Leu+Tyr+H – CO]; 209 [MePro+Leu+H]; 181 [MePro – Leu+H – CO]; 84 MePro immonium; 72 Val immonium.

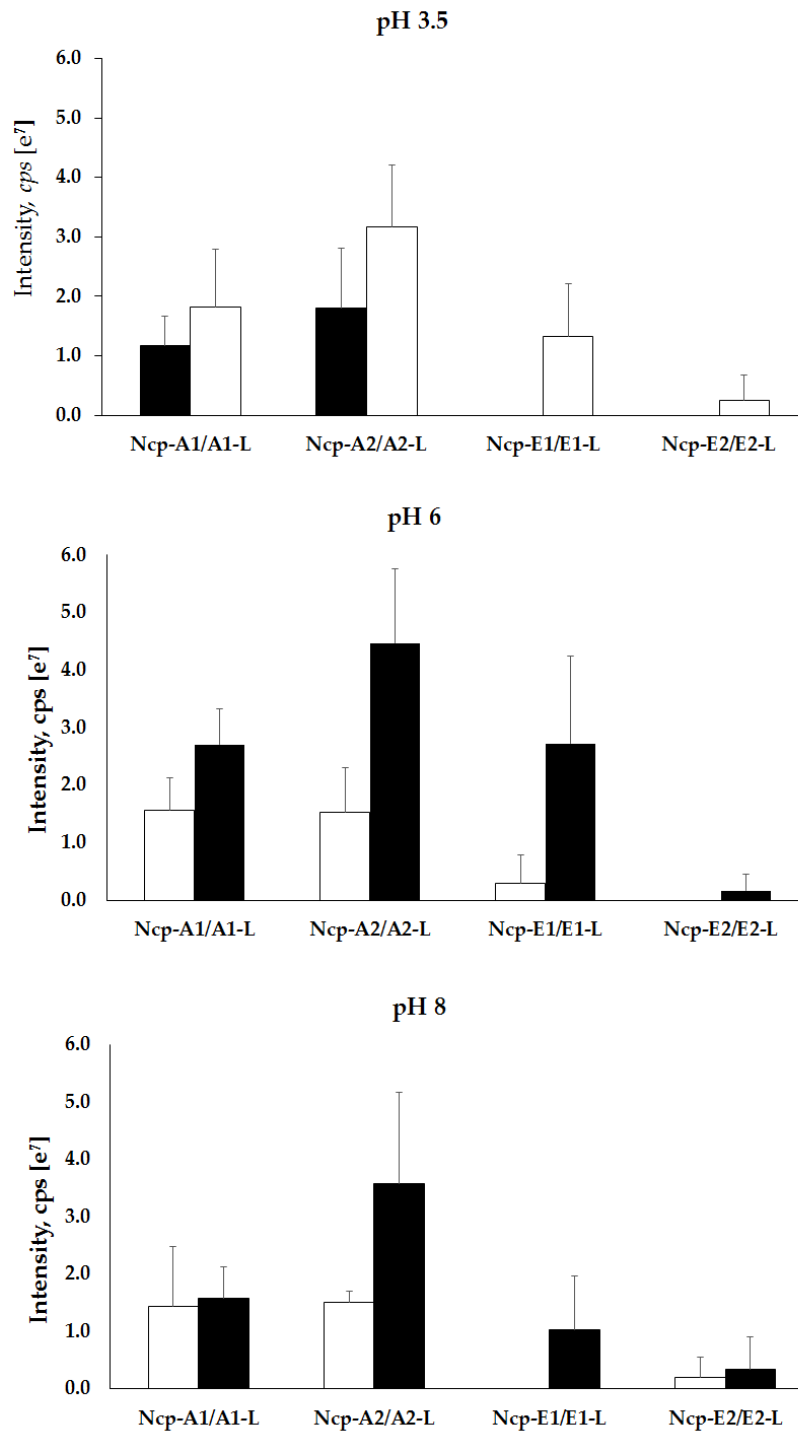

**Figure S8:** Relative cell contents of nostocyclopeptides extracted from 10 mg of lyophilized biomass of *N. edaphicum* CCNP1411 with 20% MeOH in different pH (3.5, 6 and 8).
